# Supplementary material for: Relevant aspects of the conversion of guaiacol as a model compound for bio-oil over supported molybdenum oxycarbide catalysts
Source: Royal Society of Chemistry journal article supplement (doi:10.1039/d0nj02531c), 2020-01-01

## **Relevant aspects of the conversion of Guaiacol as a model compound for bio-oil over supported Molybdenum Carbide catalysts**

Elodie Blanco<sup>a,b\*</sup>, Diego A. Aguirre-Abarca<sup>b,d</sup>, J. N. Díaz de León<sup>c</sup>, Nestor Escalona<sup>a,b,d,e\*\*</sup>

<sup>a</sup>*Departamento de Ingeniería Química y Bioprocesos. Pontificia Universidad Católica, Santiago, Chile. Avenida Vicuña Mackenna 4860, Macul, Santiago, Chile.*

<sup>b</sup>*Millenium Nuclei on Catalytic Processes towards Sustainable Chemistry (CSC)*

<sup>c</sup>*Universidad Nacional Autónoma de México, Centro de Nanociencias y Nanotecnologías, México*

<sup>d</sup>*Departamento de Química Física, Facultad de Química y de Farmacia. Pontificia Universidad Católica, Santiago, Chile.*

<sup>e</sup>*Unidad de Desarrollo Tecnológico, Universidad de Concepción, Coronel, Chile*

**Supporting information**

**ESI:** N<sub>2</sub> adsorption-desorption isotherms as a function of the carburization temperature

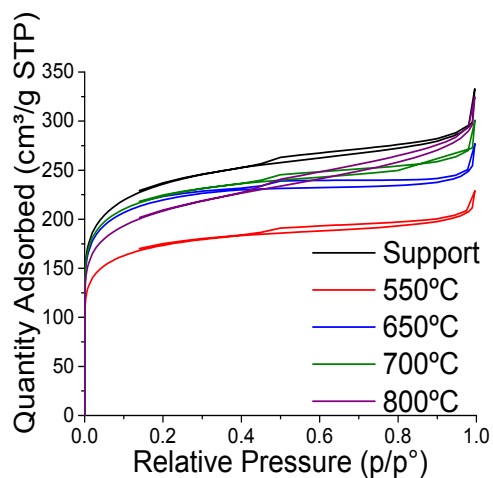

**ESI 2:** XPS deconvolution of the Mo 3d band carburized at different temperature and different Mo loading.

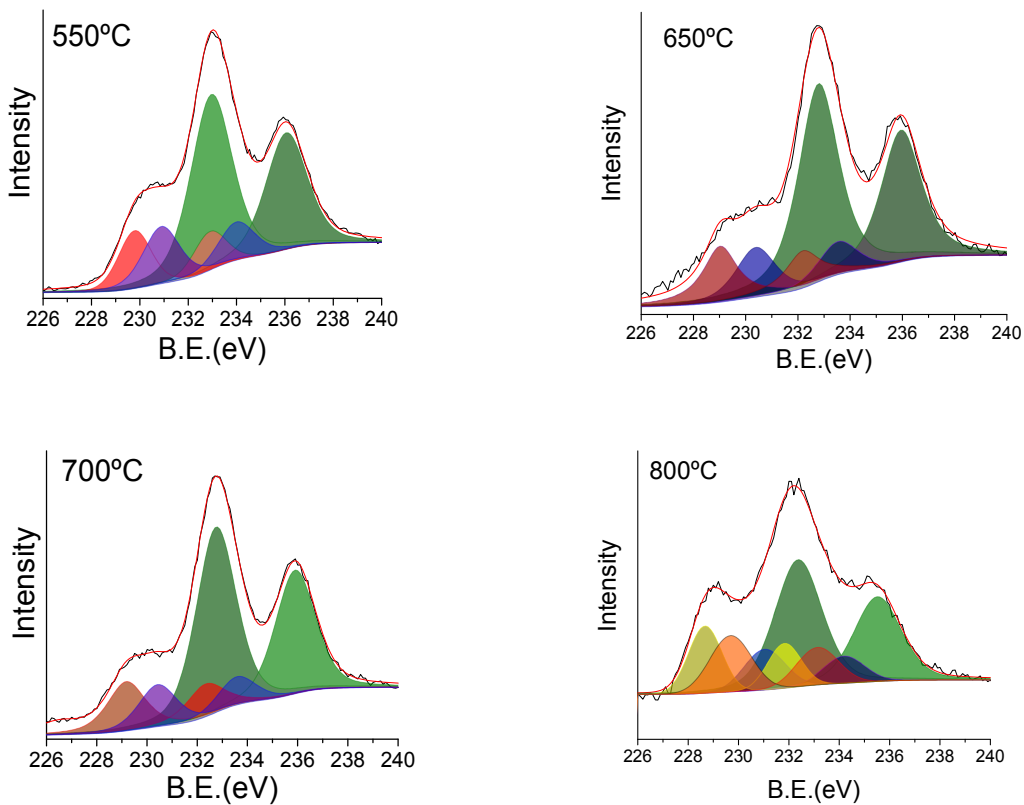

**ESI 3:** Evolution of guaiacol conversion with time.

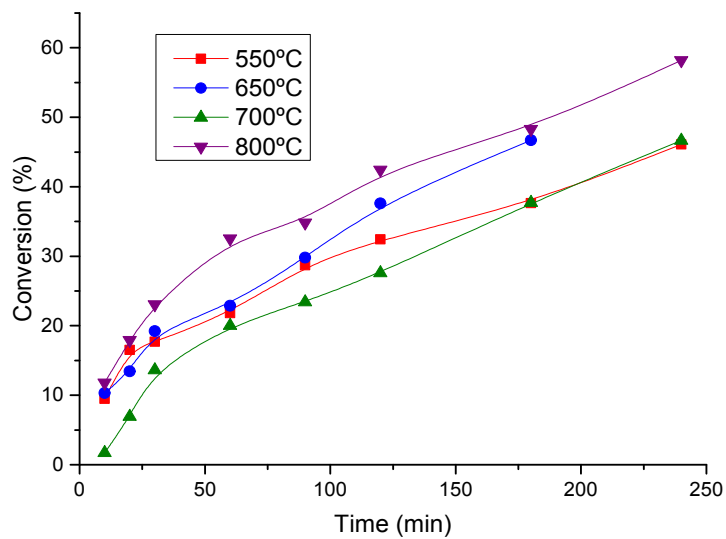

**ESI 4:** Evolution of the product' selectivities as a function of the guaiacol conversion obtained for the different catalysts prepared.

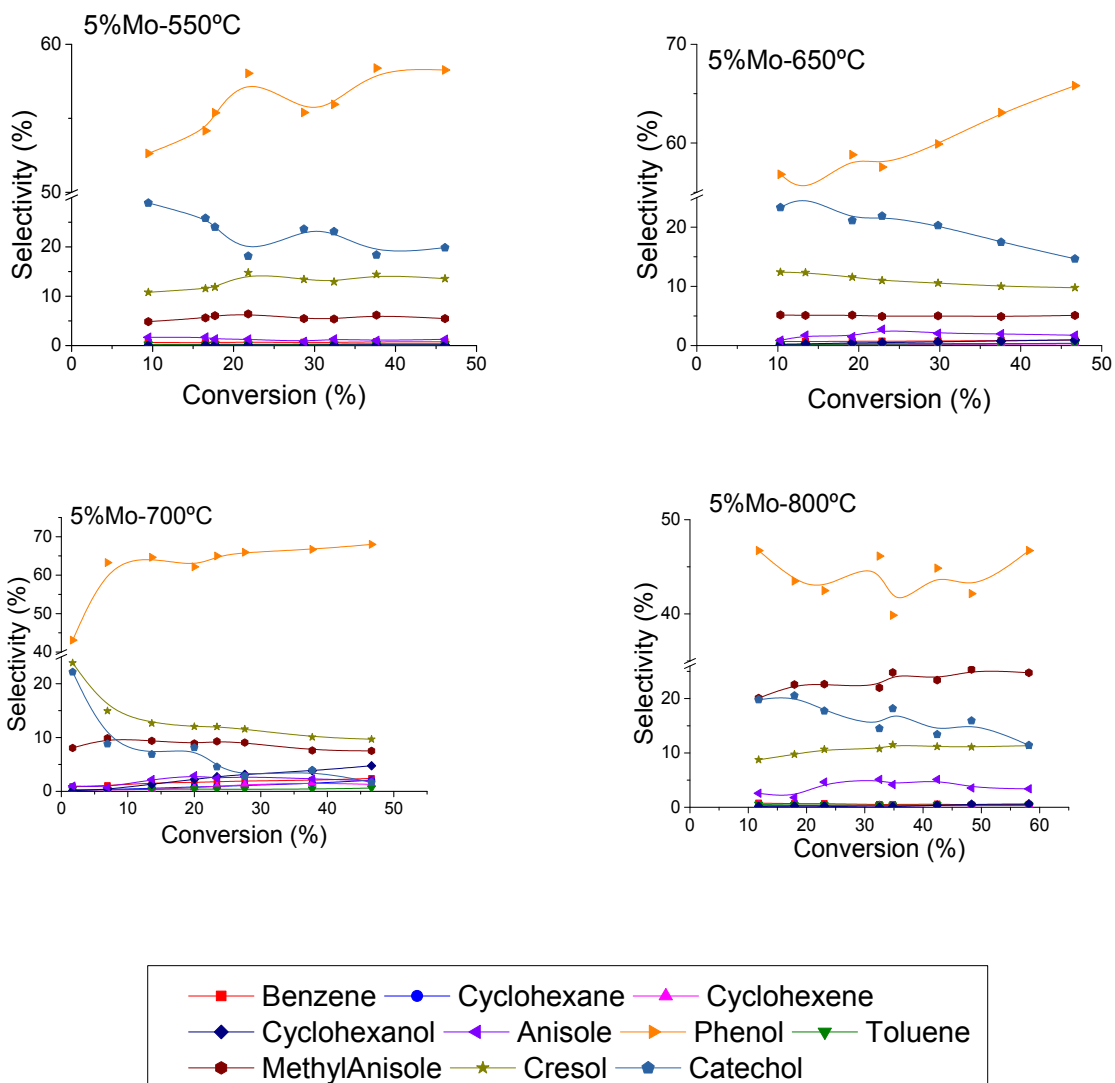

Supplement: d0nj02531c1.pdf [file d0nj02531c1.pdf]
